# Supplementary figures and images for: Heat Shock Cognate 70 Functions as A Chaperone for the Stability of Kinetochore Protein CENP-N in Holocentric Insect Silkworms
Source: MDPI journal article supplement (doi:10.3390/ijms20235823), 2019-11-20

## Supplementary Figure S1

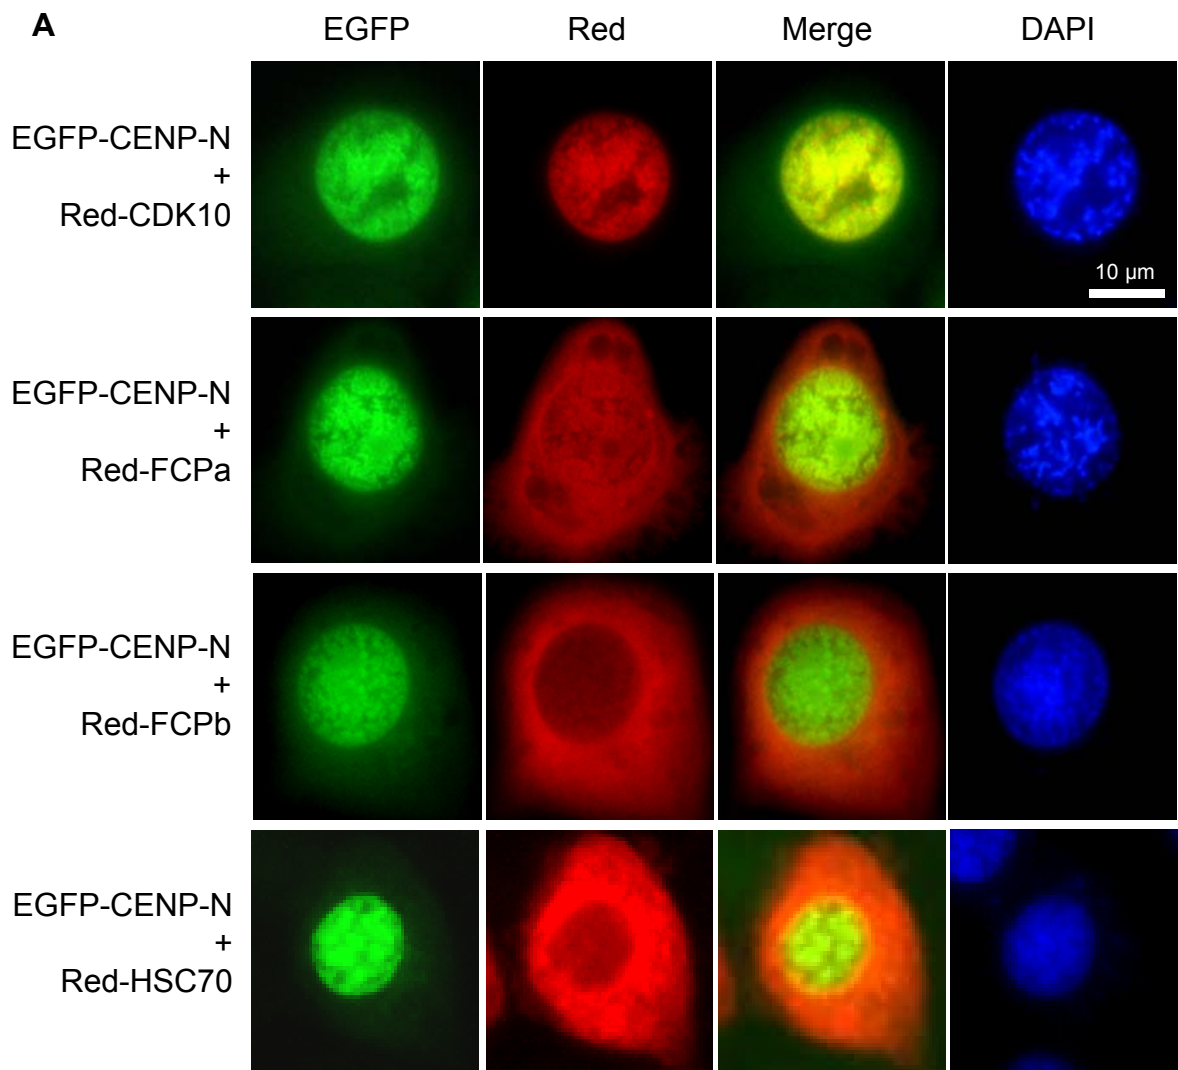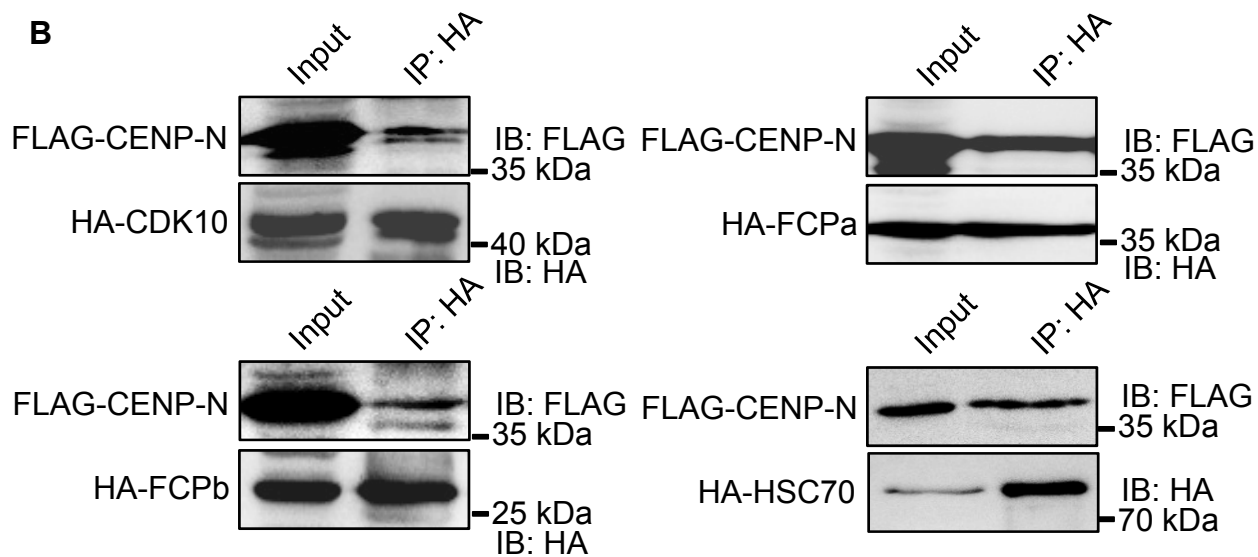

Supplement: s1 [file s1]
